# Supplementary material for: A Best-Fit Framework and Systematic Review of Asymmetric Gameplay in Multiplayer Virtual Reality Games
Source: Frontiers journal article supplement (doi:10.3389/frvir.2021.694660), 2021-07-27
Supplement: Data_Sheet_8.PDF [file Data_Sheet_8.PDF]

| Paper Info |                                                                                                                   |                                                                                                                                                                                                     |                                                                                      |      |          |                                        | Shared Control (Sykownik et al. 2017)                                                                                                                                                                                                                                                                                                   |                                                                                                                        |                              |  |                                                                                                                                                                                                                                                                                                                                                      |
|------------|-------------------------------------------------------------------------------------------------------------------|-----------------------------------------------------------------------------------------------------------------------------------------------------------------------------------------------------|--------------------------------------------------------------------------------------|------|----------|----------------------------------------|-----------------------------------------------------------------------------------------------------------------------------------------------------------------------------------------------------------------------------------------------------------------------------------------------------------------------------------------|------------------------------------------------------------------------------------------------------------------------|------------------------------|--|------------------------------------------------------------------------------------------------------------------------------------------------------------------------------------------------------------------------------------------------------------------------------------------------------------------------------------------------------|
|            |                                                                                                                   |                                                                                                                                                                                                     |                                                                                      |      |          |                                        | Distinct Loci of Manipulation (Two players share two distinct LoM)                                                                                                                                                                                                                                                                      |                                                                                                                        | Mutual Locus of Manipulation |  | No shared Control/ Indirect                                                                                                                                                                                                                                                                                                                          |
| Index      | Title                                                                                                             | Link to the paper                                                                                                                                                                                   | Author                                                                               | Year | Database | Notes                                  | entities                                                                                                                                                                                                                                                                                                                                | environment                                                                                                            |                              |  | One player controls an entity in the game, the other player can only observe and communicate but has no loci of manipulation in game                                                                                                                                                                                                                 |
| 1          | Asymmetric interface: User interface of asymmetric virtual reality for new presence and experience                | <a href="https://www.mdpi.com/2073-8994/12/1/53">https://www.mdpi.com/2073-8994/12/1/53</a>                                                                                                         | Jeong, K. and Kim, J. and Kim, M. and Lee, J. and Kim, C.                            | 2020 | Scopus   |                                        | First person view<br>HMD<br>"Here, an HMD user performs the role by searching for an object corresponding to the correct answer in the VR space and grabs it with a hand."<br>non_HMD<br>"Here, an HMD user performs the role by searching for an object corresponding to the correct answer in the VR space and grabs it with a hand." |                                                                                                                        |                              |  | Third person view:<br>"HMD<br>In the case of third-person viewpoint, with the roles of observer and assistant, the non-HMD user views the hint (the number of letters, the first letter of the word) for the word and delivers the information required for finding a correct answer to the HMD user while observing the movements of the HMD user." |
| 2          | Enhancing Communication and Awareness in Asymmetric Games                                                         | <a href="https://link.springer.com/chapter/10.1007/978-3-030-34644-7_20">https://link.springer.com/chapter/10.1007/978-3-030-34644-7_20</a>                                                         | Bortolaso, C. and Bourdiol, J. and Graham, T.C.N.                                    | 2019 | Scopus   |                                        | One player controls environment and objects within it, the other only the camera                                                                                                                                                                                                                                                        | One player controls environment and objects within it, the other only the camera                                       |                              |  |                                                                                                                                                                                                                                                                                                                                                      |
| 3          | Audio source localization as an input to virtual reality systems                                                  | <a href="https://secure.aes.org/forum/pubs/conventions/2elib-19415">https://secure.aes.org/forum/pubs/conventions/2elib-19415</a>                                                                   | Kerure, A.A. and Freeman, J.                                                         | 2018 | Scopus   |                                        | VR player interacts in VR to find the bucket, AR player controls magic torch entity, tablet player cues the cat entity                                                                                                                                                                                                                  | VR player interacts in VR to find the bucket, AR player controls magic torch entity, tablet player cues the cat entity |                              |  |                                                                                                                                                                                                                                                                                                                                                      |
| 4          | RoleVR: Multi-experience in immersive virtual reality between co-located HMD and non-HMD users                    | <a href="https://link.springer.com/article/10.1007/s11042-019-08220-w">https://link.springer.com/article/10.1007/s11042-019-08220-w</a>                                                             | Lee, J. and Kim, M. and Kim, J.                                                      | 2020 | Scopus   |                                        | Depending on variant                                                                                                                                                                                                                                                                                                                    |                                                                                                                        |                              |  | Depending on variant                                                                                                                                                                                                                                                                                                                                 |
| 5          | MagicTorch: A context-aware projection system for asymmetrical VR games                                           | <a href="https://dl.acm.org/doi/pdf/10.1145/3130859.3131341">https://dl.acm.org/doi/pdf/10.1145/3130859.3131341</a>                                                                                 | Li, J. and Deng, H. and Michalatos, P.                                               | 2017 | Scopus   | almost duplicate of #11                | VR player interacts in VR to find the bucket, AR player controls magic torch entity, tablet player cues the cat entity                                                                                                                                                                                                                  | VR player interacts in VR to find the bucket, AR player controls magic torch entity, tablet player cues the cat entity |                              |  |                                                                                                                                                                                                                                                                                                                                                      |
| 6          | Self-overlapping maze and map design for asymmetric collaboration in room-scale virtual reality for public spaces | <a href="https://link.springer.com/chapter/10.1007/978-3-319-76908-0_19">https://link.springer.com/chapter/10.1007/978-3-319-76908-0_19</a>                                                         | Serubugo, S. and Skantarova, D. and Evers, N. and Kraus, M.                          | 2018 | Scopus   |                                        | Yes                                                                                                                                                                                                                                                                                                                                     |                                                                                                                        |                              |  | Yes                                                                                                                                                                                                                                                                                                                                                  |
| 7          | Facilitating asymmetric collaborative navigation in room-scale virtual reality for public spaces                  | <a href="https://link.springer.com/chapter/10.1007/978-3-319-76908-0_7">https://link.springer.com/chapter/10.1007/978-3-319-76908-0_7</a>                                                           | Serubugo, S. and Skantarova, D. and Evers, N. and Kraus, M.                          | 2018 | Scopus   |                                        | Yes                                                                                                                                                                                                                                                                                                                                     |                                                                                                                        |                              |  | Yes                                                                                                                                                                                                                                                                                                                                                  |
| 8          | Resolving spatial variation and allowing spectator participation in multiplayer VR                                | <a href="https://dl.acm.org/doi/pdf/10.1145/2984751.2984779">https://dl.acm.org/doi/pdf/10.1145/2984751.2984779</a>                                                                                 | Sra, M. and Jain, D. and Caetano, A.P. and Calvo, A. and Hilton, E. and Schmandt, C. | 2016 | Scopus   |                                        | Yes                                                                                                                                                                                                                                                                                                                                     |                                                                                                                        |                              |  | Yes                                                                                                                                                                                                                                                                                                                                                  |
| 9          | ShareVR: Enabling co-located experiences for virtual reality between HMD and Non-HMD users                        | <a href="https://dl.acm.org/doi/pdf/10.1145/3025453.3025683">https://dl.acm.org/doi/pdf/10.1145/3025453.3025683</a>                                                                                 | Gugenheimer, J. and Stemasov, E. and Frommel, J. and Rukzio, E.                      | 2017 | Scopus   |                                        | Yes                                                                                                                                                                                                                                                                                                                                     | Yes                                                                                                                    |                              |  |                                                                                                                                                                                                                                                                                                                                                      |
| 10         | Astaire: A collaborative mixed reality dance game for collocated players                                          | <a href="https://dl.acm.org/doi/pdf/10.1145/3311350.3347152">https://dl.acm.org/doi/pdf/10.1145/3311350.3347152</a>                                                                                 | Zhou, Z. and Segura, E.M. and Duval, J. and John, M. and Isbister, K.                | 2019 | Scopus   |                                        | Yes                                                                                                                                                                                                                                                                                                                                     |                                                                                                                        |                              |  | Yes                                                                                                                                                                                                                                                                                                                                                  |
| 11         | CatEscape: An asymmetrical multiplatform game connecting virtual, augmented and physical world                    | <a href="https://dl.acm.org/doi/pdf/10.1145/3130859.3130860">https://dl.acm.org/doi/pdf/10.1145/3130859.3130860</a>                                                                                 | Li, J. and Deng, H. and Michalatos, P.                                               | 2017 | Scopus   | refer to #5 (almost duplicate thereof) |                                                                                                                                                                                                                                                                                                                                         |                                                                                                                        |                              |  |                                                                                                                                                                                                                                                                                                                                                      |
| 12         | GalVR: A novel collaboration interface using GVS                                                                  | <a href="https://dl.acm.org/doi/pdf/10.1145/3139131.3141219">https://dl.acm.org/doi/pdf/10.1145/3139131.3141219</a>                                                                                 | Sra, M. and Xu, X. and Maes, P.                                                      | 2017 | Scopus   |                                        | while VR player physically navigates the VE                                                                                                                                                                                                                                                                                             |                                                                                                                        |                              |  | nonVR controls the gsv (which is kind of VR player) and tells about obstacles                                                                                                                                                                                                                                                                        |
| 13         | A Demonstration of ShareVR: Co-Located Experiences for Virtual Reality between HMD and Non-HMD Users              | <a href="https://www.uni-ulm.de/fileadmin/ua/baite_uni_ulm/ulm_inst_100/institut/Papers/ShareVR.pdf">https://www.uni-ulm.de/fileadmin/ua/baite_uni_ulm/ulm_inst_100/institut/Papers/ShareVR.pdf</a> | Gugenheimer, J. and Stemasov, E. and Frommel, J. and Hukzio, E.                      | 2018 | Scopus   | refer to #9 (demo paper thereof)       |                                                                                                                                                                                                                                                                                                                                         |                                                                                                                        |                              |  |                                                                                                                                                                                                                                                                                                                                                      |

| Paper Info                  |                                                                                                                                      |                                                                                                                                                                                                         |                                                                                       |      |        |  | Shared Control (Sykownik et al. 2017)                                                                                                                                                                                                                                                                                                                                                                                                                                                                                                                                                                                                                                                                                                                                                      |                                                                                                                                                                                                                                                                                                                                                                                                                                                                                                                                                                                                                                                                                                                                                                                            |                              |  |                                                                                                                                      |
|-----------------------------|--------------------------------------------------------------------------------------------------------------------------------------|---------------------------------------------------------------------------------------------------------------------------------------------------------------------------------------------------------|---------------------------------------------------------------------------------------|------|--------|--|--------------------------------------------------------------------------------------------------------------------------------------------------------------------------------------------------------------------------------------------------------------------------------------------------------------------------------------------------------------------------------------------------------------------------------------------------------------------------------------------------------------------------------------------------------------------------------------------------------------------------------------------------------------------------------------------------------------------------------------------------------------------------------------------|--------------------------------------------------------------------------------------------------------------------------------------------------------------------------------------------------------------------------------------------------------------------------------------------------------------------------------------------------------------------------------------------------------------------------------------------------------------------------------------------------------------------------------------------------------------------------------------------------------------------------------------------------------------------------------------------------------------------------------------------------------------------------------------------|------------------------------|--|--------------------------------------------------------------------------------------------------------------------------------------|
|                             |                                                                                                                                      |                                                                                                                                                                                                         |                                                                                       |      |        |  | Distinct Loci of Manipulation (Two players share two distinct LOM)                                                                                                                                                                                                                                                                                                                                                                                                                                                                                                                                                                                                                                                                                                                         |                                                                                                                                                                                                                                                                                                                                                                                                                                                                                                                                                                                                                                                                                                                                                                                            | Mutual Locus of Manipulation |  | No shared Control/ Indirect                                                                                                          |
|                             |                                                                                                                                      |                                                                                                                                                                                                         |                                                                                       |      |        |  | entities                                                                                                                                                                                                                                                                                                                                                                                                                                                                                                                                                                                                                                                                                                                                                                                   | environment                                                                                                                                                                                                                                                                                                                                                                                                                                                                                                                                                                                                                                                                                                                                                                                |                              |  | One player controls an entity in the game, the other player can only observe and communicate but has no loci of manipulation in game |
| 14                          | Neomento sad-vr treatment for social anxiety                                                                                         | <a href="https://seexplora.issa.org/stamp/stamp.jsp?arnumber=8942236">https://seexplora.issa.org/stamp/stamp.jsp?arnumber=8942236</a>                                                                   | Streck, A. and Stepnicka, P. and Klaubert, J. and Wolbers, T.                         | 2019 | Scopus |  | yes<br>"Our approach is, in its core, an asymmetric two-player game, where the patient is placed in the VE, while the therapist is granted control of the running simulation and can trigger challenges (e.g. trigger a cell phone) and assume control of the VAs (see Fig. 1). This approach solves two problems: "by giving the control of the environment to the therapist, they can assure that the amount of induced stress follows the pattern necessary for successful habituation of the patient [5]. This is manifested for example by the amount of attention the VAs pay to the user." Apart from the interactions enabled by the therapist, there are multiple methods available to the patient. In particular, it is necessary that the patient can navigate through the VE." | yes<br>"Our approach is, in its core, an asymmetric two-player game, where the patient is placed in the VE, while the therapist is granted control of the running simulation and can trigger challenges (e.g. trigger a cell phone) and assume control of the VAs (see Fig. 1). This approach solves two problems: "by giving the control of the environment to the therapist, they can assure that the amount of induced stress follows the pattern necessary for successful habituation of the patient [5]. This is manifested for example by the amount of attention the VAs pay to the user." Apart from the interactions enabled by the therapist, there are multiple methods available to the patient. In particular, it is necessary that the patient can navigate through the VE." |                              |  |                                                                                                                                      |
| 15                          | BirdquestTVR: A cross-platform asymmetric communication game                                                                         | <a href="https://dl.acm.org/doi/pdf/10.1145/3341215.3358246">https://dl.acm.org/doi/pdf/10.1145/3341215.3358246</a>                                                                                     | Smilovitch, M. and Lachman, R.                                                        | 2019 | Scopus |  | sounds like only the VR player has an in-game entity / representation, while the VR player controls the game environment / some systems of the virtual spaceship:<br>"Each player has access to several ship systems. The VR player can turn engines on or off by physically reaching out and pressing buttons, while the tablet player can control a series of "boosters" and "roosters" by tapping buttons on their mobile device."                                                                                                                                                                                                                                                                                                                                                      | sounds like only the VR player has an in-game entity / representation, while the VR player controls the game environment / some systems of the virtual spaceship:<br>"Each player has access to several ship systems. The VR player can turn engines on or off by physically reaching out and pressing buttons, while the tablet player can control a series of "boosters" and "roosters" by tapping buttons on their mobile device."                                                                                                                                                                                                                                                                                                                                                      |                              |  |                                                                                                                                      |
| 16                          | The influence of social entities in virtual reality games on player experience and immersion                                         | <a href="https://dl.acm.org/doi/pdf/10.1145/3102071.3102086">https://dl.acm.org/doi/pdf/10.1145/3102071.3102086</a>                                                                                     | Liszio, S. and Emmerich, K. and Masuch, M.                                            | 2017 | Scopus |  | non-HMD player controls tortoise, HMD player controls first-person perspective camera entity                                                                                                                                                                                                                                                                                                                                                                                                                                                                                                                                                                                                                                                                                               |                                                                                                                                                                                                                                                                                                                                                                                                                                                                                                                                                                                                                                                                                                                                                                                            |                              |  |                                                                                                                                      |
| 17                          | Telesight: Enabling asymmetric collaboration in VR between HMD user and Non-HMD users                                                | <a href="https://dl.acm.org/doi/pdf/10.1145/3305367.3335040">https://dl.acm.org/doi/pdf/10.1145/3305367.3335040</a>                                                                                     | Furukawa, T. and Yamamoto, D. and Sugawa, M. and Peiris, R. and Minamizawa, K.        | 2019 | Scopus |  | yes<br>nonVR controls the game environment, VR controls tries to find treasure with the help of nonVR                                                                                                                                                                                                                                                                                                                                                                                                                                                                                                                                                                                                                                                                                      | yes<br>nonVR controls the game environment, VR controls tries to find treasure with the help of nonVR                                                                                                                                                                                                                                                                                                                                                                                                                                                                                                                                                                                                                                                                                      |                              |  |                                                                                                                                      |
| 18                          | FaceDisplay: Towards asymmetric multi-user interaction for nomadic virtual reality                                                   | <a href="https://dl.acm.org/doi/pdf/10.1145/3173574.3173628">https://dl.acm.org/doi/pdf/10.1145/3173574.3173628</a>                                                                                     | Gugenheimer, J. and Stemasov, E. and Sareen, H. and Rukzio, E.                        | 2018 | Scopus |  | Conductor? HMD controls first-person camera perspective, nonHMD controls hand entity representation                                                                                                                                                                                                                                                                                                                                                                                                                                                                                                                                                                                                                                                                                        | SpaceFace? HMD controls entity in space helmet, nonHMD "controls" a hand entity representation?                                                                                                                                                                                                                                                                                                                                                                                                                                                                                                                                                                                                                                                                                            |                              |  |                                                                                                                                      |
| 19                          | Walkable Self-Overlapping Virtual Reality Maze and Map Visualization Demo: Public Virtual Reality Setup for Asymmetric Collaboration | <a href="https://dl.acm.org/doi/pdf/10.1145/3139131.3141774">https://dl.acm.org/doi/pdf/10.1145/3139131.3141774</a>                                                                                     | Serubugo, Sule and Skantarova, Denisa and Evers, Nicolaj and Kraus, Martin            | 2017 | ACM    |  | non-VR "player" only engages in verbal communication / guidance. VR player navigates the VE                                                                                                                                                                                                                                                                                                                                                                                                                                                                                                                                                                                                                                                                                                |                                                                                                                                                                                                                                                                                                                                                                                                                                                                                                                                                                                                                                                                                                                                                                                            |                              |  | No shared control: non-VR "player" only engages in verbal communication / guidance may                                               |
| Added via Snowball Approach |                                                                                                                                      |                                                                                                                                                                                                         |                                                                                       |      |        |  |                                                                                                                                                                                                                                                                                                                                                                                                                                                                                                                                                                                                                                                                                                                                                                                            |                                                                                                                                                                                                                                                                                                                                                                                                                                                                                                                                                                                                                                                                                                                                                                                            |                              |  |                                                                                                                                      |
| 20                          | Maze Commander: A Collaborative Asynchronous Game Using the Oculus Rift & the Sifteo Cubes                                           | <a href="https://dl.acm.org/doi/pdf/10.1145/2658537.2658690">https://dl.acm.org/doi/pdf/10.1145/2658537.2658690</a>                                                                                     | Pejman Sajjadi, Edgar Omar Cebolledo Gutierrez, Sandra Trullemans, and Olga De Troyer | 2014 | ACM    |  | yes: VR "player" only engages in verbal communication / guidance and non-VR player interacts with sifteo cubes                                                                                                                                                                                                                                                                                                                                                                                                                                                                                                                                                                                                                                                                             |                                                                                                                                                                                                                                                                                                                                                                                                                                                                                                                                                                                                                                                                                                                                                                                            |                              |  | Yes                                                                                                                                  |
| 21                          | FaceDisplay: Enabling Multi-User                                                                                                     | <a href="https://dl.acm.org/doi/pdf/10.1145/3027063.3052962">https://dl.acm.org/doi/pdf/10.1145/3027063.3052962</a>                                                                                     | Gugenheimer, J., Stemasov, E., Sareen, H., & Rukzio, E                                | 2017 | ACM    |  | Yes: both slice fruit at whatever location they choose                                                                                                                                                                                                                                                                                                                                                                                                                                                                                                                                                                                                                                                                                                                                     | Yes: both slice fruit at whatever location they choose                                                                                                                                                                                                                                                                                                                                                                                                                                                                                                                                                                                                                                                                                                                                     |                              |  |                                                                                                                                      |
| 22                          | Designing Shared Virtual Reality G                                                                                                   | <a href="https://hal.inria.fr/hal-01640287/document">https://hal.inria.fr/hal-01640287/document</a>                                                                                                     | Stefan Liszio, Maic Masuch                                                            | 2016 | Scopus |  | Mech player and scout player both control entities in the VR world                                                                                                                                                                                                                                                                                                                                                                                                                                                                                                                                                                                                                                                                                                                         | Co-pilot player controls part of the game environment without entity representation in the world                                                                                                                                                                                                                                                                                                                                                                                                                                                                                                                                                                                                                                                                                           |                              |  |                                                                                                                                      |
| 23                          | SpielRaum: Perspectives for Colla                                                                                                    | <a href="https://dl.acm.org/doi/pdf/10.1145/2793107.2810306?casa_token=MVXK0uqFz-USA4AA4-JS8w8JJVO3d7">https://dl.acm.org/doi/pdf/10.1145/2793107.2810306?casa_token=MVXK0uqFz-USA4AA4-JS8w8JJVO3d7</a> | Michael Schmitz, Mert Akbal, Soenke Zehle                                             | 2015 | ACM    |  | VR player has no entity - non-VR player has the entity                                                                                                                                                                                                                                                                                                                                                                                                                                                                                                                                                                                                                                                                                                                                     |                                                                                                                                                                                                                                                                                                                                                                                                                                                                                                                                                                                                                                                                                                                                                                                            |                              |  | VR player has no entity - non-VR player has the entity                                                                               |
| 24                          | Haptic Turk: A MotionPlatform Based on People                                                                                        | <a href="https://dl.acm.org/doi/10.1145/2556288.2557101">https://dl.acm.org/doi/10.1145/2556288.2557101</a>                                                                                             | Lung-Pan Cheng, Patrick Lühne, Pedro Lopes, Christoph Sterz, and Patrick Baudisch.    | 2014 | ACM    |  | This: HMD player navigates, actuator "players" control motion cues in environment                                                                                                                                                                                                                                                                                                                                                                                                                                                                                                                                                                                                                                                                                                          | This: HMD player navigates, actuator "players" control motion cues in environment                                                                                                                                                                                                                                                                                                                                                                                                                                                                                                                                                                                                                                                                                                          |                              |  |                                                                                                                                      |

| Paper Info |                                                                          |                                                                                                                                                                                                                                                                                                                                 |                                                                                                                            |      |          |       | Shared Control (Sykownik et al. 2017)                              |                             |                              |  |                                                                                                                                      |
|------------|--------------------------------------------------------------------------|---------------------------------------------------------------------------------------------------------------------------------------------------------------------------------------------------------------------------------------------------------------------------------------------------------------------------------|----------------------------------------------------------------------------------------------------------------------------|------|----------|-------|--------------------------------------------------------------------|-----------------------------|------------------------------|--|--------------------------------------------------------------------------------------------------------------------------------------|
|            |                                                                          |                                                                                                                                                                                                                                                                                                                                 |                                                                                                                            |      |          |       | Distinct Loci of Manipulation (Two players share two distinct LoM) |                             | Mutual Locus of Manipulation |  | No shared Control/ Indirect                                                                                                          |
| Index      | Title                                                                    | Link to the paper                                                                                                                                                                                                                                                                                                               | Author                                                                                                                     | Year | Database | Notes | entities                                                           | environment                 |                              |  | One player controls an entity in the game, the other player can only observe and communicate but has no loci of manipulation in game |
| 25         | UbiBeam++: Augmenting Interactive Projection with Head-Mounted Displays. | <a href="https://dl.acm.org/doi/pdf/10.1145/2971495.2996747?casa_token=ISuXDO661hgAAA-AAq4w1R-vxGrW/SEEMNtp5RjyvvN3dWq_9uv9Hvtn6XLQ8Y46Zuw88LZjxyZ4HDsStGuQjh-EBg">https://dl.acm.org/doi/pdf/10.1145/2971495.2996747?casa_token=ISuXDO661hgAAA-AAq4w1R-vxGrW/SEEMNtp5RjyvvN3dWq_9uv9Hvtn6XLQ8Y46Zuw88LZjxyZ4HDsStGuQjh-EBg</a> | Pascal Knierim, Markus Funk, Thomas Kosch, Anton Fedosov, Tamara Müller, Benjamin Schopf, MarcWeise, and Albrecht Schmidt. | 2016 | ACM      |       |                                                                    | yes : no entity in the game |                              |  |                                                                                                                                      |
